# Supplementary material for: Mucosal DNA methylome alteration in Crohn’s disease: surgical and non-surgical groups
Source: Frontiers journal article supplement (doi:10.3389/fgene.2023.1244513), 2023-11-17
Supplement: Image_1.pdf [file Image_1.pdf]

## *Supplementary Material*

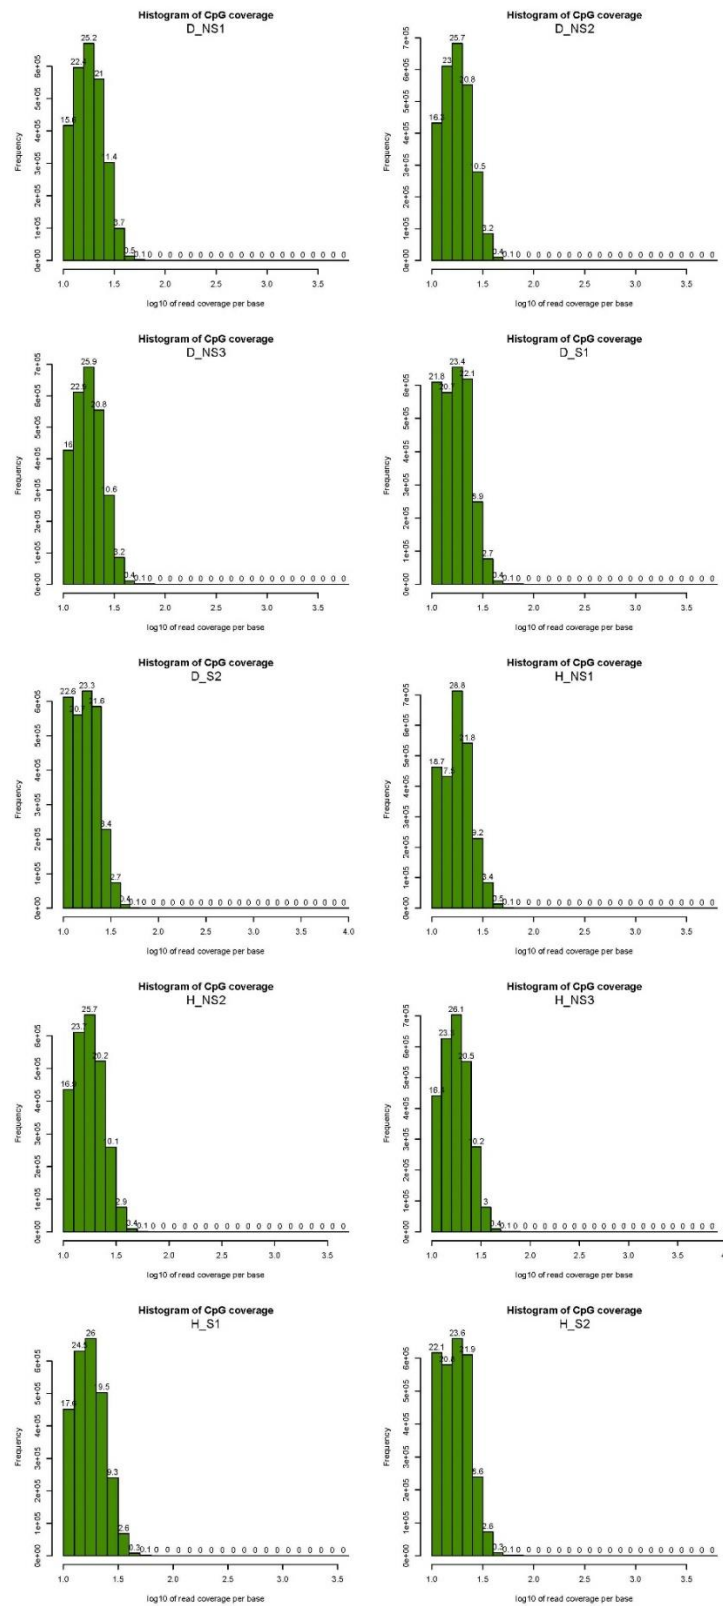

**Figure S1.** Descriptive Statistics per sample, histogram of CpG coverage of diseased non-surgical patient sample.

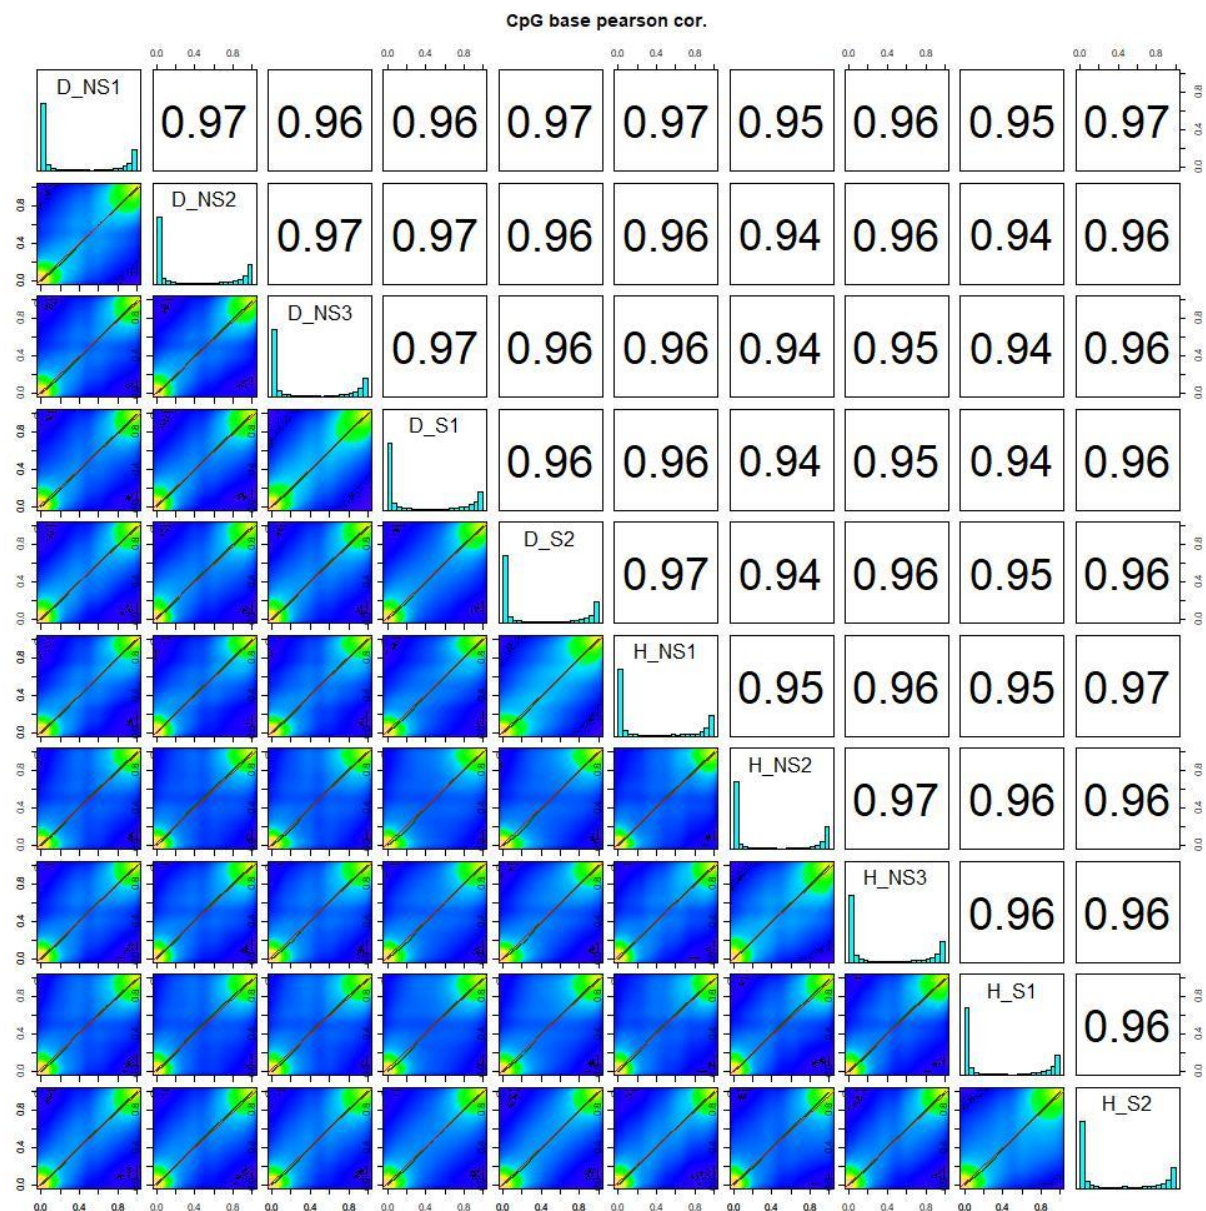

**Figure S2.** Pair-wise Pearson's correlation coefficients between different groups

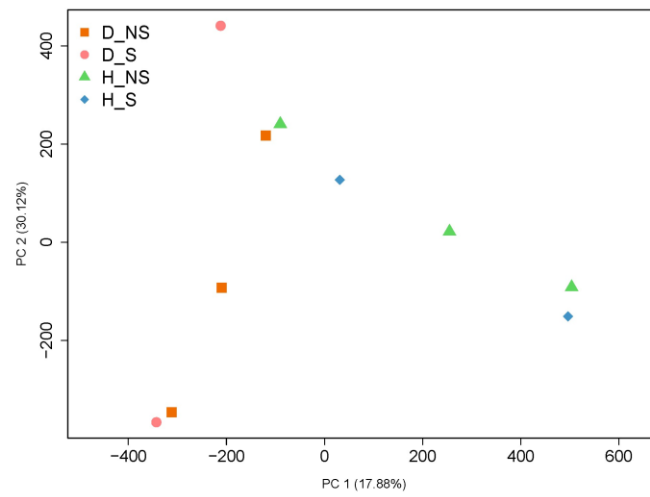

**Figure S3.** Principal Component Analysis (PCA) including all samples which demonstrates separation of the diseased and healthy samples.

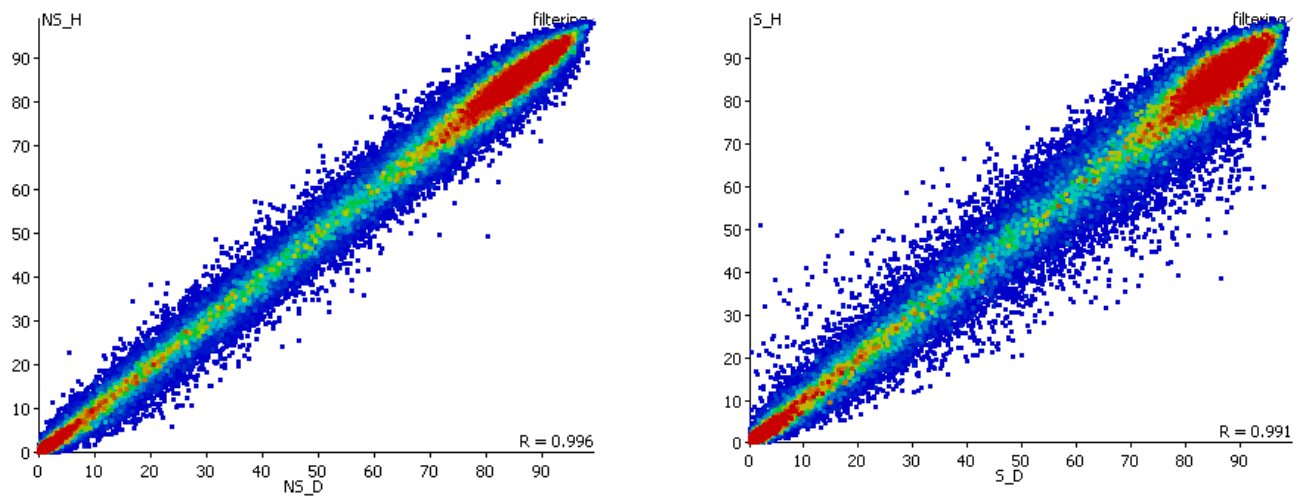

**Figure S4** Scatter plots shown the correlation between healthy and diseased tissue in surgical and non-surgical group and the variation between the surgical replicates.

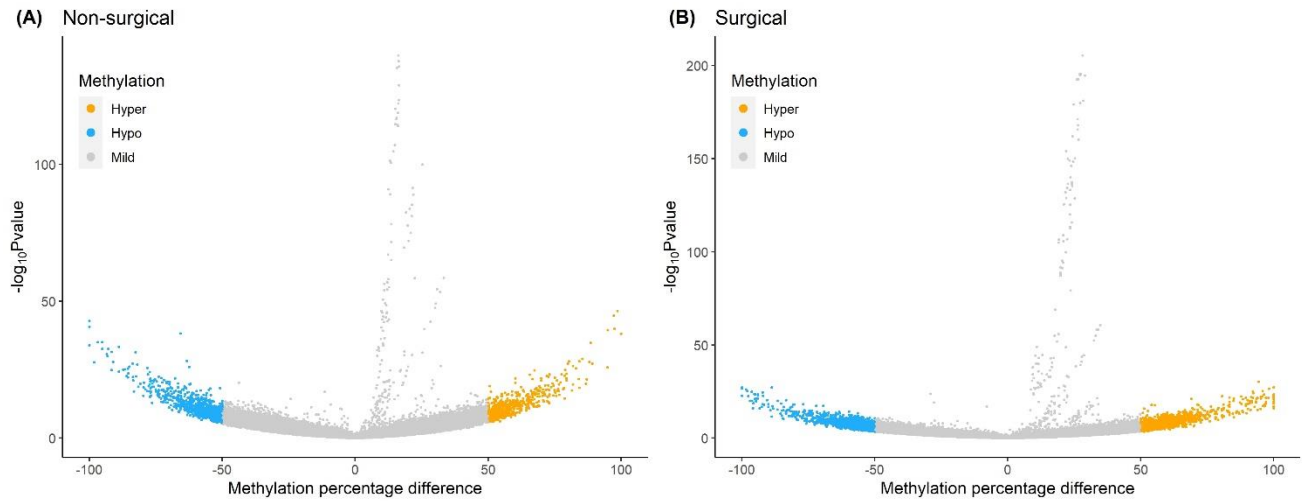

**Figure S5** Volcano plots show the mean difference between diseased and healthy patient samples in non-surgical and surgical cohorts. Yellow dots represent the hypermethylated bases, and the blue dots represent the hypomethylated bases.

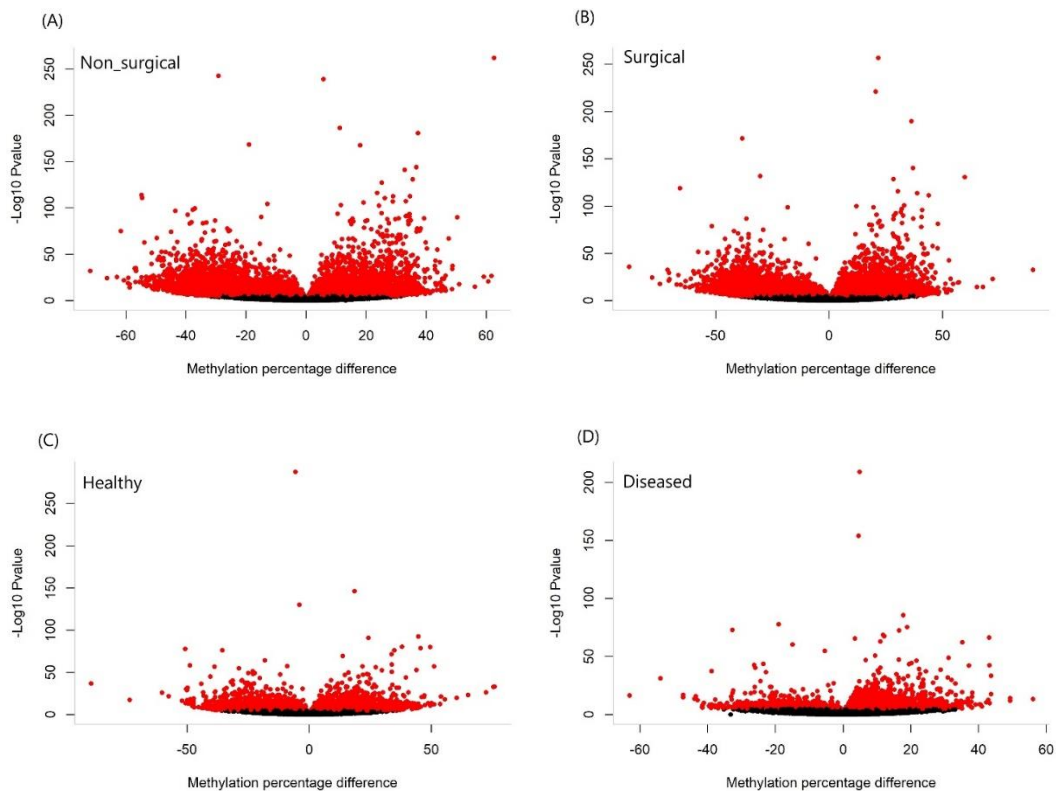

**Figure S6** (A) & (B) Volcano plots show the mean difference between diseased and healthy patient samples in non-surgical and surgical cohorts. (C) & (D) show the mean difference between non-surgical patient samples and surgical patient samples in healthy and diseased.

A

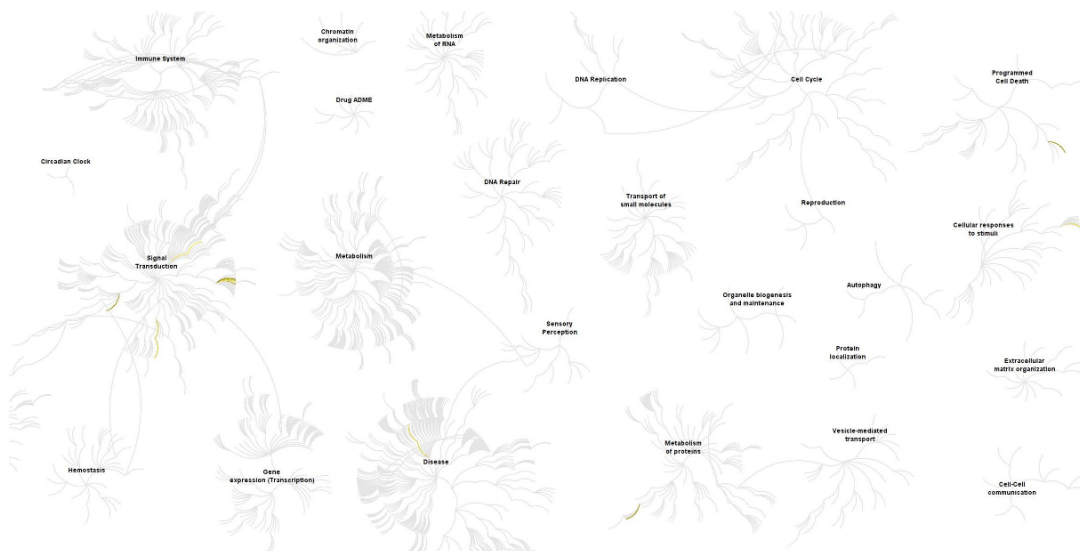

| Pathway identifier | Pathway name                                      | #Entities found | #Entities total | Entities ratio | Entities pValue | Entities FDR | #Reactions found | #Reactions total | Reactions ratio |
|--------------------|---------------------------------------------------|-----------------|-----------------|----------------|-----------------|--------------|------------------|------------------|-----------------|
| R-HSA-186797       | Signaling by PDGF                                 | 4               | 70              | 0.004558       | 1.06E-04        | 0.024959     | 24               | 31               | 0.002141        |
| R-HSA-186763       | Downstream signal transduction                    | 3               | 37              | 0.002409       | 2.99E-04        | 0.035327     | 15               | 16               | 0.001105        |
| R-HSA-9818030      | NFE2L2 regulating tumorigenic genes               | 2               | 17              | 0.001107       | 0.001626374     | 0.126857     | 2                | 12               | 8.29E-04        |
| R-HSA-9013026      | RHOB GTPase cycle                                 | 3               | 75              | 0.004884       | 0.002273867     | 0.134158     | 3                | 6                | 4.14E-04        |
| R-HSA-2219530      | Constitutive Signaling by Aberrant PI3K in Cancer | 3               | 96              | 0.006251       | 0.004532583     | 0.201327     | 1                | 2                | 1.38E-04        |
| R-HSA-2219528      | PI3K/AKT Signaling in Cancer                      | 3               | 124             | 0.008074       | 0.009130356     | 0.201327     | 1                | 21               | 0.00145         |
| R-HSA-6811558      | PI3P, PP2A and IER3 Regulate PI3K/AKT Signaling   | 3               | 129             | 0.0084         | 0.010157082     | 0.201327     | 1                | 7                | 4.83E-04        |
| R-HSA-199418       | Negative regulation of the PI3K/AKT network       | 3               | 137             | 0.008921       | 0.011934714     | 0.201327     | 1                | 10               | 6.91E-04        |
| R-HSA-8980692      | RHOA GTPase cycle                                 | 3               | 154             | 0.010028       | 0.016274166     | 0.201327     | 3                | 6                | 4.14E-04        |
| R-HSA-9013106      | RHOA GTPase cycle                                 | 2               | 79              | 0.005144       | 0.03066401      | 0.201327     | 2                | 6                | 4.14E-04        |
| R-HSA-72731        | Recycling of eIF2-GDP                             | 1               | 10              | 6.51E-04       | 0.03934064      | 0.201327     | 2                | 2                | 1.38E-04        |
| R-HSA-416482       | G alpha (12/13) signalling events                 | 2               | 86              | 0.0056         | 0.035790828     | 0.201327     | 5                | 15               | 0.001036        |
| R-HSA-351906       | Apoptotic cleavage of cell adhesion proteins      | 1               | 11              | 7.16E-04       | 0.037264672     | 0.201327     | 1                | 10               | 6.91E-04        |
| R-HSA-198203       | PI3K/AKT activation                               | 1               | 13              | 8.47E-04       | 0.043892127     | 0.201327     | 2                | 5                | 3.45E-04        |
| R-HSA-9013423      | RAC3 GTPase cycle                                 | 2               | 100             | 0.006512       | 0.046947174     | 0.201327     | 2                | 6                | 4.14E-04        |

B

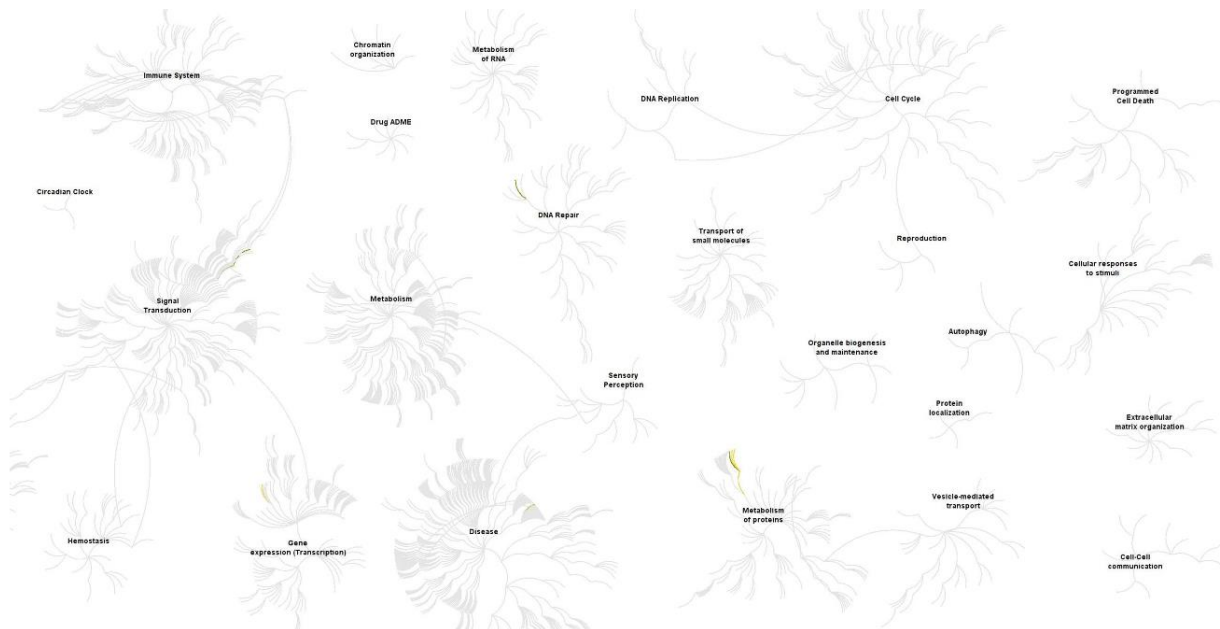

| Pathway identifier | Pathway name                                                                          | #Entities found | #Entities total | Entities ratio | Entities pValue | Entities FDR | #Reactions found | #Reactions total | Reactions ratio |
|--------------------|---------------------------------------------------------------------------------------|-----------------|-----------------|----------------|-----------------|--------------|------------------|------------------|-----------------|
| R-HSA-3065679      | SUMO is proteolytically processed                                                     | 2               | 6               | 3.91E-04       | 8.74E-04        | 0.289361907  | 2                | 3                | 2.07E-04        |
| R-HSA-3065676      | SUMO is conjugated to E1 (UBA2:SAE1)                                                  | 2               | 8               | 5.21E-04       | 0.001539159     | 0.289361907  | 2                | 3                | 2.07E-04        |
| R-HSA-9022707      | MECP2 regulates transcription factors                                                 | 2               | 10              | 6.51E-04       | 0.002382804     | 0.2978950524 | 2                | 8                | 5.52E-04        |
| R-HSA-3215018      | Processing and activation of SUMO                                                     | 2               | 13              | 8.47E-04       | 0.003971554     | 0.373326048  | 5                | 9                | 6.21E-04        |
| R-HSA-5619048      | Defective SLC11A2 causes hypochromic microcytic anemia, with iron overload 1 (AHMID1) | 1               | 3               | 1.95E-04       | 0.021070157     | 0.387892662  | 1                | 1                | 6.91E-05        |
| R-HSA-9025046      | NTF3 activates NTRK2 (TRKB) signaling                                                 | 1               | 4               | 2.60E-04       | 0.02799532      | 0.387892662  | 3                | 3                | 2.07E-04        |
| R-HSA-9024909      | BDNF activates NTRK2 (TRKB) signaling                                                 | 1               | 4               | 2.60E-04       | 0.02799532      | 0.387892662  | 3                | 3                | 2.07E-04        |
| R-HSA-9026357      | NTF4 activates NTRK2 (TRKB) signaling                                                 | 1               | 4               | 2.60E-04       | 0.02799532      | 0.387892662  | 3                | 3                | 2.07E-04        |
| R-HSA-9026527      | Activated NTRK2 signals through PLCG1                                                 | 1               | 6               | 3.91E-04       | 0.041700351     | 0.387892662  | 3                | 3                | 2.07E-04        |
| R-HSA-5696395      | Formation of Incision Complex in GG-NER                                               | 2               | 47              | 0.003060494    | 0.044442457     | 0.387892662  | 2                | 10               | 6.91E-04        |
| R-HSA-9032759      | NTRK2 activates RAC1                                                                  | 1               | 7               | 4.56E-04       | 0.048480892     | 0.387892662  | 2                | 2                | 1.38E-04        |
| R-HSA-3065678      | SUMO is transferred from E1 to E2 (UBE2I, UBC9)                                       | 1               | 7               | 4.56E-04       | 0.048480892     | 0.387892662  | 1                | 3                | 2.07E-04        |

**Figure S7** Reactome Pathway Analysis of differentially methylated genes in Non-Surgical (A) and Surgical (B) Groups. Overrepresented pathways are depicted by gold lines in the analysis. The tables showcase details of the top pathways with a p-value < 0.05.
