# Supplementary material for: Mucosal DNA methylome alteration in Crohn’s disease: surgical and non-surgical groups
Source: Front Genet. 2023 Nov 17;14:1244513. doi: 10.3389/fgene.2023.1244513 (PMC10691104; doi:10.3389/fgene.2023.1244513)
Supplement: Supplementary file 1 [file Table1.xlsx]

## Sheet: Table S1
Descriptive statistics of sequencing reads before and after trimming
Sample	Filename	Number of Reads	After Trimming_Filename	Total Reads	Aligned Reads	Unaligned Reads	Ambiguously Aligned Reads	Total Cs	Methylated CpGs	Unmethylated CpGs	Methylated chgs	Unmethylated chgs	Methylated CHHs	Unmethylated CHHs
NS1_D	NS1_D_CTCGAACA_L002_R1_001.fastq.gz	27451725	NS1_D_CTCGAACA_L002_R1_001.fastq_trimmed_bismark_bt2.bam	25930224	19044993	2054348	4830883	427578080	25886520	32342188	591151	109289565	1248444	258220212
	NS1_D_CTCGAACA_L002_R2_001.fastq.gz	27451725
NS1_H	NS1_H_CCTATACC_L002_R1_001.fastq.gz	27422906	NS1_H_CCTATACC_L002_R1_001.fastq_trimmed_bismark_bt2.bam	25920818	19048264	2010109	4862445	426345090	25554881	31905687	600985	108849280	1271688	258162569
	NS1_H_CCTATACC_L002_R2_001.fastq.gz	27422906
NS2_D	NS2_D_ACGGACTT_L002_R1_001.fastq.gz	27358047	NS2_D_ACGGACTT_L002_R1_001.fastq_trimmed_bismark_bt2.bam	25649385	18800157	1917864	4931364	418911240	25005619	32366637	599248	107140535	1269164	252530037
	NS2_D_ACGGACTT_L002_R2_001.fastq.gz	27358047
NS2_H	NS2_H_AACGCCTT_L002_R1_001.fastq.gz	29127824	NS2_H_AACGCCTT_L002_R1_001.fastq_trimmed_bismark_bt2.bam	27593264	20284325	2082270	5226669	452335765	27291328	33837503	665054	115599285	1399238	273543357
	NS2_H_AACGCCTT_L002_R2_001.fastq.gz	29127824
NS3_D	NS3_D_CTAAGACC_L002_R1_001.fastq.gz	28410394	NS3_D_CTAAGACC_L002_R1_001.fastq_trimmed_bismark_bt2.bam	26826031	19668081	2066352	5091598	440784305	26871513	32633437	685506	112356316	1441761	266795772
	NS3_D_CTAAGACC_L002_R2_001.fastq.gz	28410394
NS3_H	NS3_H_TCCATTGC_L002_R1_001.fastq.gz	25170157	NS3_H_TCCATTGC_L002_R1_001.fastq_trimmed_bismark_bt2.bam	23789115	17474141	1754637	4560337	389992163	23505743	29529106	572384	99528155	1207426	235649349
	NS3_H_TCCATTGC_L002_R2_001.fastq.gz	25170157
S1_D	S1_D_AACCGAAC_L002_R1_001.fastq.gz	27147948	S1_D_AACCGAAC_L002_R1_001.fastq_trimmed_bismark_bt2.bam	24889675	18334709	1939397	4615569	411062399	25381570	30441127	604078	104871752	1294863	248469009
	S1_D_AACCGAAC_L002_R2_001.fastq.gz	27147948
S1_H	S1_H_CAAGCCAA_L002_R1_001.fastq.gz	27732916	S1_H_CAAGCCAA_L002_R1_001.fastq_trimmed_bismark_bt2.bam	26036212	19235868	2009300	4791044	430451554	26377445	31346861	701647	109699790	1506090	260819721
	S1_H_CAAGCCAA_L002_R2_001.fastq.gz	27732916
S2_D	S2_D_CCTTAGGT_L002_R1_001.fastq.gz	25808803	S2_D_CCTTAGGT_L002_R1_001.fastq_trimmed_bismark_bt2.bam	24753318	18156628	1835278	4761412	403781783	24737183	30429969	649725	103087959	1383365	243493582
	S2_D_CCTTAGGT_L002_R2_001.fastq.gz	25808803
S2_H	S2_H_AGGTTCCT_L002_R1_001.fastq.gz	28449816	S2_H_AGGTTCCT_L002_R1_001.fastq_trimmed_bismark_bt2.bam	27414882	20187119	2020768	5206995	450044312	27397997	33408581	785831	114730332	1664671	272056900
	S2_H_AGGTTCCT_L002_R2_001.fastq.gz	28449816
Total Reads		274080536		258802924

## Sheet: Table S2
Summarized statistics of sequence alignment. NS: Non-surgical patient; S: surgical patient; D: patient with Crohn'’s disease; H: healthy patient sample and number of CpG site for each sample after data filtering.
Sample Name	Group	% GC	% Mapped	% Aligned (Bowtie2)	% Dups	Total Sequences(millions)	Number of CpG site	% Aligned (Hisat2)
NS1_D	NS	0.33	1	0.734	0.663	25.9	2664815	0.729
NS1_H	NS	0.33	1	0.735	0.662	25.9	2477481	0.73
NS2_D	NS	0.33	1	0.733	0.656	25.6	2655316	0.727
NS2_H	NS	0.33	1	0.735	0.66	27.6	2580472	0.73
NS3_D	NS	0.33	1	0.733	0.66	26.8	2666823	0.728
NS3_H	NS	0.33	1	0.735	0.651	23.8	2690448	0.729
S1_D	S	0.33	1	0.737	0.654	24.9	2580472	0.731
S1_H	S	0.33	1	0.739	0.65	26	2573714	0.734
S2_D	S	0.33	1	0.734	0.647	24.8	2703728	0.728
S2_H	S	0.33	1	0.736	0.66	27.4	2790347	0.731
Average		0.33	1	0.7351	0.6563	25.87	2.63836e+06	0.7297

## Sheet: Table S3
DMC enrichment in promoter, exon, intron, and intergenic region.
	Promoter (%)	Exon (%)	Intron (%)	Intergenic (%)
Non-surgical	0.049	0.156	0.264	0.251
Surgical	0.01	0.342	0.493	0.528

## Sheet: Table S4
Differentially methylated regions (DMRs) in Non-surgical group
seqnames	start	end	width	strand	pvalue	qvalue	meth.diff	location	promoter_gene_id	promoter_gene_name	exon_gene_id	exon_gene_name	intron_gene_id	intron_gene_name	dist_nearest_TSS	TSS_strand	TSS_gene_id	TSS_gene_name
chr1	17521001	17522000	1000	*	8.71298e-33	1.42554e-30	-56.6808	intergenic	NA	NA	NA	NA	NA	NA	-17699	+	ENSG00000074964.17	ARHGEF10L
chr2	50479001	50480000	1000	*	2.43986e-18	1.26193e-16	-53.2213	intron	NA	NA	NA	NA	ENSG00000179915.25	NRXN1	109416	-	ENSG00000230327.1	MTCO1P42
chr2	83953001	83954000	1000	*	8.26574e-36	1.62022e-33	-56.7811	intergenic	NA	NA	NA	NA	NA	NA	-77141	+	ENSG00000228225.1	CRLF3P3
chr2	120511001	120512000	1000	*	1.93356e-13	5.89443e-12	-51.0886	intergenic	NA	NA	NA	NA	NA	NA	33250	-	ENSG00000237614.3	ENSG00000237614
chr2	190856001	190857000	1000	*	2.98245e-17	1.37986e-15	-52.1998	intergenic	NA	NA	NA	NA	NA	NA	-12268	-	ENSG00000228509.7	ENSG00000228509
chr3	43001001	43002000	1000	*	2.49525e-18	1.28976e-16	51.0121	exon intron	NA	NA	ENSG00000144649.10	GASK1A	ENSG00000273291.5; ENSG00000144649.10; ENSG00000144649.10	ENSG00000273291; GASK1A; GASK1A	21915	+	ENSG00000144649.10	GASK1A
chr3	150519001	150520000	1000	*	4.56138e-26	4.627e-24	-50.4903	intergenic	NA	NA	NA	NA	NA	NA	-26679	+	ENSG00000144895.12	EIF2A
chr3	195809001	195810000	1000	*	1.19822e-114	4.86182e-111	-54.7963	exon intron	NA	NA	ENSG00000145113.22	MUC4	ENSG00000145113.22	MUC4	1974	-	ENSG00000145113.22	MUC4
chr3	195810001	195811000	1000	*	1.04148e-75	1.17384e-72	-61.7433	promoter exon intron	ENSG00000145113.22	MUC4	ENSG00000145113.22	MUC4	ENSG00000145113.22	MUC4	974	-	ENSG00000145113.22	MUC4
chr4	150087001	150088000	1000	*	9.38551e-33	1.53248e-30	-71.9638	intron	NA	NA	NA	NA	ENSG00000170390.16	DCLK2	8557	+	ENSG00000170390.16	DCLK2
chr4	153248001	153249000	1000	*	3.4327e-25	3.28112e-23	-59.2161	intron	NA	NA	NA	NA	ENSG00000288637.1; ENSG00000109654.16	ENSG00000288637; TRIM2	16756	-	ENSG00000252030.1	RNU6-1196P
chr5	10725001	10726000	1000	*	5.78402e-23	4.5793e-21	-52.2263	intron	NA	NA	NA	NA	ENSG00000112977.16	DAP	-35066	+	ENSG00000272324.5	DAP-DT
chr5	179827001	179828000	1000	*	5.81831e-26	5.86535e-24	-51.8981	intron	NA	NA	NA	NA	ENSG00000161011.20	SQSTM1	-17833	+	ENSG00000222448.1	RN7SKP150
chr6	155437001	155438000	1000	*	2.69941e-27	3.03406e-25	61.7435	intron	NA	NA	NA	NA	ENSG00000074771.4	NOX3	17840	-	ENSG00000074771.4	NOX3
chr7	515001	516000	1000	*	4.95161e-14	1.61636e-12	-51.1244	intron	NA	NA	NA	NA	ENSG00000197461.13	PDGFA	4297	-	ENSG00000197461.13	PDGFA
chr7	74475001	74476000	1000	*	1.02336e-22	7.94706e-21	-60.7506	intron	NA	NA	NA	NA	ENSG00000006704.11	GTF2IRD1	11541	-	ENSG00000238391.1	RNA5SP233
chr7	77734001	77735000	1000	*	2.49489e-22	1.87119e-20	-50.479	intron	NA	NA	NA	NA	ENSG00000187257.16	RSBN1L	37543	+	ENSG00000187257.16	RSBN1L
chr7	150371001	150372000	1000	*	1.51618e-63	1.17181e-60	-53.8787	promoter exon intron	ENSG00000240449.1	REPIN1-AS1	ENSG00000214022.12; ENSG00000240449.1	REPIN1; REPIN1-AS1	ENSG00000196456.13; ENSG00000214022.12; ENSG00000240449.1; ENSG00000240449.1	ZNF775; REPIN1; REPIN1-AS1; REPIN1-AS1	591	-	ENSG00000240449.1	REPIN1-AS1
chr9	35791001	35792000	1000	*	1.41602e-90	2.80271e-87	50.3061	promoter exon intron	ENSG00000159899.16	NPR2	ENSG00000159899.16; ENSG00000159899.16; ENSG00000159899.16	NPR2; NPR2; NPR2	ENSG00000159899.16; ENSG00000159899.16	NPR2; NPR2	0	+	ENSG00000159899.16	NPR2
chr9	69120001	69121000	1000	*	4.04143e-40	1.0281e-37	-51.4756	promoter exon intron	ENSG00000119139.21	TJP2	ENSG00000285130.2	ENSG00000285130	ENSG00000285130.2	ENSG00000285130	-265	+	ENSG00000119139.21	TJP2
chr9	113388001	113389000	1000	*	1.23706e-18	6.62629e-17	-50.5192	exon intron	NA	NA	ENSG00000148218.16; ENSG00000148218.16	ALAD; ALAD	ENSG00000148218.16	ALAD	-11016	-	ENSG00000119431.10	HDHD3
chr9	125972001	125973000	1000	*	1.17839e-22	9.08144e-21	-53.3659	intergenic	NA	NA	NA	NA	NA	NA	-84581	+	ENSG00000232413.1	ENSG00000232413
chr10	3526001	3527000	1000	*	7.03085e-16	2.81064e-14	56.1945	intergenic	NA	NA	NA	NA	NA	NA	-23087	-	ENSG00000233321.4	LINC02669
chr10	12484001	12485000	1000	*	1.79915e-26	1.88148e-24	-53.2967	intron	NA	NA	NA	NA	ENSG00000183049.14	CAMK1D	27519	+	ENSG00000252118.1	RNU6ATAC39P
chr10	131949001	131950000	1000	*	1.59399e-26	1.67774e-24	59.1799	intron	NA	NA	NA	NA	ENSG00000175470.20	PPP2R2D	-21203	+	ENSG00000277959.1	ENSG00000277959
chr11	2903001	2904000	1000	*	6.76807e-13	1.92849e-11	-50.6298	promoter exon intron	ENSG00000254827.7	SLC22A18AS	ENSG00000110628.16; ENSG00000254827.7	SLC22A18; SLC22A18AS	ENSG00000110628.16; ENSG00000110628.16; ENSG00000254827.7	SLC22A18; SLC22A18; SLC22A18AS	0	-	ENSG00000254827.7	SLC22A18AS
chr11	61944001	61945000	1000	*	5.52797e-25	5.18014e-23	-66.3578	intergenic	NA	NA	NA	NA	NA	NA	-5064	+	ENSG00000167995.17	BEST1
chr11	62703001	62704000	1000	*	6.59097e-26	6.61141e-24	-54.8153	exon intron	NA	NA	ENSG00000168000.16	BSCL2	ENSG00000234857.2; ENSG00000168000.16	HNRNPUL2-BSCL2; BSCL2	-3677	+	ENSG00000162188.6	GNG3
chr11	71889001	71890000	1000	*	4.20842e-52	2.0698e-49	-51.424	intron	NA	NA	NA	NA	ENSG00000289716.1; ENSG00000254469.11	XNDC1N-ZNF705EP-ALG1L9P; XNDC1N	-3411	+	ENSG00000228915.3	OR7E128P
chr12	3544001	3545000	1000	*	9.50582e-21	6.17619e-19	-54.8515	intron	NA	NA	NA	NA	ENSG00000111218.12	PRMT8	-51183	-	ENSG00000287243.2	THCAT155
chr12	6224001	6225000	1000	*	5.2741e-27	5.76816e-25	-51.2632	exon intron	NA	NA	ENSG00000010278.15; ENSG00000010278.15	CD9; CD9	ENSG00000010278.15; ENSG00000010278.15	CD9; CD9	9456	-	ENSG00000202318.1	Y_RNA
chr12	58051001	58052000	1000	*	3.11856e-26	3.20346e-24	-62.9918	intergenic	NA	NA	NA	NA	NA	NA	-35893	+	ENSG00000257541.1	LINC02403
chr12	67915001	67916000	1000	*	2.72486e-18	1.4013e-16	-54.2075	intergenic	NA	NA	NA	NA	NA	NA	-13236	+	ENSG00000255772.5	LINC01479
chr12	95549001	95550000	1000	*	8.13095e-21	5.30413e-19	-55.553	intron	NA	NA	NA	NA	ENSG00000136014.12	USP44	1477	-	ENSG00000136014.12	USP44
chr12	110575001	110576000	1000	*	3.74468e-14	1.23631e-12	-51.3393	intron	NA	NA	NA	NA	ENSG00000196850.6	PPTC7	7319	-	ENSG00000196850.6	PPTC7
chr14	34452001	34453000	1000	*	5.74507e-25	5.37117e-23	-50.9724	intron	NA	NA	NA	NA	ENSG00000129521.15; ENSG00000165389.7	EGLN3; SPTSSA	9241	-	ENSG00000165389.7	SPTSSA
chr16	81726001	81727000	1000	*	1.37783e-20	8.76959e-19	-50.5389	intergenic	NA	NA	NA	NA	NA	NA	-11249	+	ENSG00000261218.6	ENSG00000261218
chr16	89853001	89854000	1000	*	2.38351e-18	1.23436e-16	-58.7762	intron	NA	NA	NA	NA	ENSG00000204991.11	SPIRE2	-19571	+	ENSG00000141002.20	TCF25
chr17	5771001	5772000	1000	*	1.06336e-262	1.07866e-258	62.5835	promoter	ENSG00000284837.1; ENSG00000285471.1	ENSG00000284837; ENSG00000285471	NA	NA	NA	NA	-235	+	ENSG00000284837.1	ENSG00000284837
chr17	48623001	48624000	1000	*	1.26849e-19	7.48105e-18	-59.3333	exon intron	NA	NA	ENSG00000170689.10	HOXB9	ENSG00000260027.5; ENSG00000170689.10	HOXB7; HOXB9	2359	-	ENSG00000170689.10	HOXB9
chr19	4548001	4549000	1000	*	1.40752e-20	8.95151e-19	-53.1543	exon intron	NA	NA	ENSG00000167680.17; ENSG00000167680.17	SEMA6B; SEMA6B	ENSG00000167680.17; ENSG00000167680.17; ENSG00000167680.17	SEMA6B; SEMA6B; SEMA6B	-7935	-	ENSG00000267385.1	ENSG00000267385
chr19	6079001	6080000	1000	*	1.90681e-35	3.63237e-33	-57.0913	intron	NA	NA	NA	NA	ENSG00000087903.13	RFX2	6179	+	ENSG00000267589.1	ENSG00000267589
chr19	8052001	8053000	1000	*	1.7237e-21	1.19047e-19	60.6347	promoter exon intron	ENSG00000131142.14	CCL25	ENSG00000131142.14; ENSG00000131142.14; ENSG00000131142.14	CCL25; CCL25; CCL25	ENSG00000131142.14; ENSG00000131142.14	CCL25; CCL25	0	+	ENSG00000131142.14	CCL25
chr19	18155001	18156000	1000	*	6.84978e-15	2.46613e-13	-58.7821	exon intron	NA	NA	ENSG00000105647.19; ENSG00000268173.3	PIK3R2; ENSG00000268173	ENSG00000105647.19; ENSG00000268173.3	PIK3R2; ENSG00000268173	1839	+	ENSG00000105647.19	PIK3R2
chr19	22633001	22634000	1000	*	2.82183e-16	1.18343e-14	-53.1915	promoter	ENSG00000229676.3	ZNF492	NA	NA	NA	NA	-325	+	ENSG00000229676.3	ZNF492
chr19	34402001	34403000	1000	*	8.15584e-28	9.52308e-26	-50.914	exon intron	NA	NA	ENSG00000105220.17	GPI	ENSG00000266953.6	ENSG00000266953	-1400	+	ENSG00000126249.8	PDCD2L
chr19	41713001	41714000	1000	*	1.39148e-22	1.06528e-20	-50.2803	intron	NA	NA	NA	NA	ENSG00000267881.2; ENSG00000105388.17	ENSG00000267881; CEACAM5	4345	+	ENSG00000267881.2	ENSG00000267881
chr20	30283001	30284000	1000	*	1.86188e-111	6.56928e-108	-54.6735	intron	NA	NA	NA	NA	ENSG00000205611.5	LINC01597	1165	+	ENSG00000286483.1	ENSG00000286483
chr21	36461001	36462000	1000	*	8.41846e-21	5.48727e-19	-56.8518	exon intron	NA	NA	ENSG00000159261.12	CLDN14	ENSG00000230479.1; ENSG00000233818.1; ENSG00000159261.12	ENSG00000230479; CLDN14-AS1; CLDN14	15271	+	ENSG00000233818.1	CLDN14-AS1
chr22	31214001	31215000	1000	*	1.33235e-15	5.16339e-14	-51.1029	intron	NA	NA	NA	NA	ENSG00000182541.18	LIMK2	1763	+	ENSG00000182541.18	LIMK2

## Sheet: Table S5
Differentially methylated regions (DMRs) in Surgical group
seqnames	start	end	width	strand	pvalue	qvalue	meth.diff	location	promoter_gene_id	promoter_gene_name	exon_gene_id	exon_gene_name	intron_gene_id	intron_gene_name	dist_nearest_TSS	TSS_strand	TSS_gene_id	TSS_gene_name
chr1	17691001	17692000	1000	*	8.48906e-20	7.65885e-18	56.8254	exon intron	NA	NA	ENSG00000074964.17	ARHGEF10L	ENSG00000074964.17; ENSG00000074964.17	ARHGEF10L; ARHGEF10L	-25626	+	ENSG00000236648.2	LINC02810
chr1	20716001	20717000	1000	*	9.15213e-13	3.61007e-11	-52.1151	intron	NA	NA	NA	NA	ENSG00000117245.13	KIF17	1018	-	ENSG00000117245.13	KIF17
chr1	44603001	44604000	1000	*	1.73346e-17	1.205e-15	-65.4656	intron	NA	NA	NA	NA	ENSG00000187147.18	RNF220	57509	+	ENSG00000263381.1	MIR5584
chr1	202010001	202011000	1000	*	1.28725e-26	2.19213e-24	-56.4151	promoter exon	ENSG00000234678.2; ENSG00000249007.1	ELF3-AS1; ENSG00000249007	ENSG00000163435.16; ENSG00000234678.2	ELF3; ELF3-AS1	NA	NA	0	-	ENSG00000234678.2	ELF3-AS1
chr1	204752001	204753000	1000	*	1.06227e-17	7.53245e-16	-67.1429	intergenic	NA	NA	NA	NA	NA	NA	24011	+	ENSG00000251861.1	ENSG00000251861
chr1	211119001	211120000	1000	*	2.79743e-11	9.0585e-10	-52.0687	intron	NA	NA	NA	NA	ENSG00000143473.13; ENSG00000284299.1; ENSG00000283952.1; ENSG00000284376.1	KCNH1; ENSG00000284299; ENSG00000283952; ENSG00000284376	13375	-	ENSG00000234233.1	KCNH1-IT1
chr1	219051001	219052000	1000	*	2.88872e-09	6.69355e-08	51.9509	intron	NA	NA	NA	NA	ENSG00000228063.4	LYPLAL1-DT	-121870	+	ENSG00000143353.12	LYPLAL1
chr2	45961001	45962000	1000	*	2.56307e-29	5.36707e-27	-59.359	intron	NA	NA	NA	NA	ENSG00000171132.14	PRKCE	42310	-	ENSG00000233829.1	RPL26P15
chr2	190856001	190857000	1000	*	8.19236e-12	2.8674e-10	-54.8799	intergenic	NA	NA	NA	NA	NA	NA	-12268	-	ENSG00000228509.7	ENSG00000228509
chr2	207479001	207480000	1000	*	2.06044e-36	6.84091e-34	-88.1356	intron	NA	NA	NA	NA	ENSG00000223725.6	ENSG00000223725	-49738	+	ENSG00000118260.15	CREB1
chr3	9253001	9254000	1000	*	3.27212e-11	1.04935e-09	-57.0814	intron	NA	NA	NA	NA	ENSG00000235830.2; ENSG00000196220.17	SRGAP3-AS4; SRGAP3	3260	+	ENSG00000235830.2	SRGAP3-AS4
chr3	12439001	12440000	1000	*	7.59519e-32	1.87792e-29	-59.9193	intergenic	NA	NA	NA	NA	NA	NA	-44422	+	ENSG00000154743.19	TSEN2
chr3	123800001	123801000	1000	*	1.83095e-13	7.95479e-12	-54.4966	exon intron	NA	NA	ENSG00000065534.20	MYLK	ENSG00000065534.20	MYLK	-13078	+	ENSG00000207002.1	ENSG00000207002
chr3	195809001	195810000	1000	*	1.34988e-79	2.79218e-76	-51.6707	exon intron	NA	NA	ENSG00000145113.22	MUC4	ENSG00000145113.22	MUC4	1974	-	ENSG00000145113.22	MUC4
chr4	998001	999000	1000	*	2.76965e-11	8.9788e-10	-54.4872	intron	NA	NA	NA	NA	ENSG00000127415.13	IDUA	-4562	-	ENSG00000145217.14	SLC26A1
chr4	2333001	2334000	1000	*	1.07758e-31	2.62605e-29	-57.4119	intron	NA	NA	NA	NA	ENSG00000159733.14	ZFYVE28	8535	+	ENSG00000249077.1	ENSG00000249077
chr4	105587001	105588000	1000	*	5.37728e-22	5.9379e-20	-53.585	intron	NA	NA	NA	NA	ENSG00000236699.9	ARHGEF38	25411	+	ENSG00000249885.1	ARHGEF38-IT1
chr4	138911001	138912000	1000	*	1.94636e-13	8.43889e-12	-57.4879	intron	NA	NA	NA	NA	ENSG00000250195.1	ENSG00000250195	12233	-	ENSG00000250577.1	ENSG00000250577
chr5	131313001	131314000	1000	*	6.03969e-11	1.84779e-09	-58.3333	intron	NA	NA	NA	NA	ENSG00000158985.14	CDC42SE2	-51395	-	ENSG00000279370.1	ENSG00000279370
chr5	172185001	172186000	1000	*	1.23184e-09	3.06539e-08	51.6782	intron	NA	NA	NA	NA	ENSG00000072786.13	STK10	2225	-	ENSG00000072786.13	STK10
chr5	176440001	176441000	1000	*	3.13992e-17	2.1423e-15	-55.6299	promoter	ENSG00000280139.1	ENSG00000280139	NA	NA	NA	NA	912	+	ENSG00000280139.1	ENSG00000280139
chr5	177489001	177490000	1000	*	1.25163e-36	4.19554e-34	-53.522	exon intron	NA	NA	ENSG00000196923.14; ENSG00000196923.14	PDLIM7; PDLIM7	ENSG00000196923.14; ENSG00000196923.14	PDLIM7; PDLIM7	-4996	+	ENSG00000248996.1	PDLIM7-AS1
chr5	180017001	180018000	1000	*	2.13619e-10	5.9988e-09	-51.6807	intron	NA	NA	NA	NA	ENSG00000113269.14	RNF130	-1605	-	ENSG00000198995.3	MIR340
chr5	180313001	180314000	1000	*	1.17796e-119	6.65997e-116	-65.6669	exon intron	NA	NA	ENSG00000131459.13	GFPT2	ENSG00000131459.13; ENSG00000131459.13	GFPT2; GFPT2	20824	+	ENSG00000248367.2	ENSG00000248367
chr5	180314001	180315000	1000	*	3.94875e-25	5.92712e-23	-78.061	intron	NA	NA	NA	NA	ENSG00000131459.13	GFPT2	21824	+	ENSG00000248367.2	ENSG00000248367
chr6	2938001	2939000	1000	*	4.75913e-15	2.54001e-13	-63.5618	intergenic	NA	NA	NA	NA	NA	NA	21108	+	ENSG00000228365.1	ENSG00000228365
chr6	10869001	10870000	1000	*	2.94063e-12	1.0914e-10	-51.7662	intron	NA	NA	NA	NA	ENSG00000272162.1	ENSG00000272162	-11781	+	ENSG00000235051.3	ENSG00000235051
chr6	25882001	25883000	1000	*	2.19531e-131	1.43214e-127	59.8028	promoter exon intron	ENSG00000124564.17; ENSG00000242387.1	SLC17A3; H2AC3P	ENSG00000242387.1; ENSG00000124564.17	H2AC3P; SLC17A3	ENSG00000124564.17	SLC17A3	0	-	ENSG00000242387.1	H2AC3P
chr6	34551001	34552000	1000	*	1.68092e-18	1.29125e-16	-50.1587	intron	NA	NA	NA	NA	ENSG00000124664.11	SPDEF	4334	-	ENSG00000124664.11	SPDEF
chr6	37755001	37756000	1000	*	4.04218e-30	8.91606e-28	-70.5999	intergenic	NA	NA	NA	NA	NA	NA	-55696	-	ENSG00000112139.17	MDGA1
chr6	166557001	166558000	1000	*	3.59481e-32	9.01968e-30	-54.9799	intron	NA	NA	NA	NA	ENSG00000071242.12	RPS6KA2	28679	-	ENSG00000235272.3	RAMACL
chr7	2524001	2525000	1000	*	2.21285e-10	6.19765e-09	-54.3333	exon intron	NA	NA	ENSG00000106003.14	LFNG	ENSG00000106003.14; ENSG00000106003.14	LFNG; LFNG	-2075	+	ENSG00000264357.1	MIR4648
chr7	5182001	5183000	1000	*	9.88412e-12	3.40888e-10	-52.2989	intergenic	NA	NA	NA	NA	NA	NA	1941	+	ENSG00000202039.1	RNU6-215P
chr8	11474001	11475000	1000	*	6.72008e-15	3.52886e-13	-50.5952	promoter exon intron	ENSG00000154319.16	FAM167A	ENSG00000154319.16	FAM167A	ENSG00000154319.16; ENSG00000154319.16	FAM167A; FAM167A	909	-	ENSG00000154319.16	FAM167A
chr8	17628001	17629000	1000	*	6.6931e-13	2.68253e-11	-56.5835	exon intron	NA	NA	ENSG00000104213.13	PDGFRL	ENSG00000104213.13; ENSG00000104213.13	PDGFRL; PDGFRL	-17733	-	ENSG00000287303.1	ENSG00000287303
chr8	98382001	98383000	1000	*	1.99525e-33	5.4061e-31	-71.2068	intron	NA	NA	NA	NA	ENSG00000104375.17	STK3	8515	-	ENSG00000278914.1	ENSG00000278914
chr8	143113001	143114000	1000	*	4.70609e-18	3.4525e-16	-51.3725	intergenic	NA	NA	NA	NA	NA	NA	32372	+	ENSG00000261667.2	LY6L
chr8	144042001	144043000	1000	*	2.77518e-21	2.87018e-19	-63.2198	intron	NA	NA	NA	NA	ENSG00000186583.12	SPATC1	-6080	+	ENSG00000204791.12	SMPD5
chr8	144646001	144647000	1000	*	9.23983e-34	2.56079e-31	-54.2359	intron	NA	NA	NA	NA	ENSG00000147799.12	ARHGAP39	-36170	+	ENSG00000274772.1	Metazoa_SRP
chr9	16223001	16224000	1000	*	7.80964e-28	1.48834e-25	-66.4024	intron	NA	NA	NA	NA	ENSG00000205549.10	C9orf92	186991	-	ENSG00000205549.10	C9orf92
chr9	71962001	71963000	1000	*	3.65218e-18	2.71932e-16	-57.3906	intron	NA	NA	NA	NA	ENSG00000155621.15	C9orf85	45137	-	ENSG00000236060.2	HSPB1P1
chr9	84758001	84759000	1000	*	2.24397e-28	4.39502e-26	-51.3803	intron	NA	NA	NA	NA	ENSG00000148053.18	NTRK2	89627	+	ENSG00000148053.18	NTRK2
chr9	111616001	111617000	1000	*	3.07646e-10	8.40005e-09	-52.2598	intron	NA	NA	NA	NA	ENSG00000204173.11	LRRC37A5P	14290	-	ENSG00000204173.11	LRRC37A5P
chr9	113934001	113935000	1000	*	1.48116e-18	1.14925e-16	51.3158	intron	NA	NA	NA	NA	ENSG00000157657.15	ZNF618	57720	+	ENSG00000157657.15	ZNF618
chr9	114295001	114296000	1000	*	1.83415e-33	5.00158e-31	89.8983	intron	NA	NA	NA	NA	ENSG00000196739.15	COL27A1	-27099	+	ENSG00000229314.6	ORM1
chr9	122390001	122391000	1000	*	3.54607e-23	4.33332e-21	-51.8062	exon intron	NA	NA	ENSG00000095303.17	PTGS1	ENSG00000095303.17; ENSG00000095303.17	PTGS1; PTGS1	11907	-	ENSG00000233616.2	ENSG00000233616
chr9	133522001	133523000	1000	*	2.66937e-11	8.67363e-10	-54.7059	intron	NA	NA	NA	NA	ENSG00000187616.5	MYMK	5613	-	ENSG00000187616.5	MYMK
chr9	137297001	137298000	1000	*	4.44425e-22	4.94624e-20	-54.2484	exon intron	NA	NA	ENSG00000288234.1	ENSG00000288234	ENSG00000288234.1; ENSG00000288234.1	ENSG00000288234; ENSG00000288234	-1281	-	ENSG00000260996.1	ENSG00000260996
chr10	1412001	1413000	1000	*	1.58396e-11	5.30743e-10	53.8265	intron	NA	NA	NA	NA	ENSG00000185736.16	ADARB2	-50365	-	ENSG00000233052.1	ENSG00000233052
chr10	97063001	97064000	1000	*	3.96855e-11	1.25302e-09	-51.4286	exon intron	NA	NA	ENSG00000187122.17	SLIT1	ENSG00000187122.17; ENSG00000187122.17	SLIT1; SLIT1	-38757	+	ENSG00000234855.2	SLIT1-AS1
chr10	119072001	119073000	1000	*	9.79945e-24	1.27856e-21	72.1519	exon intron	NA	NA	ENSG00000107581.13	EIF3A	ENSG00000107581.13	EIF3A	7824	-	ENSG00000107581.13	EIF3A
chr10	131083001	131084000	1000	*	3.83608e-13	1.59084e-11	50.9259	intergenic	NA	NA	NA	NA	NA	NA	-11219	+	ENSG00000230098.1	TCERG1L-AS1
chr10	131588001	131589000	1000	*	3.14472e-15	1.72061e-13	65.1822	intergenic	NA	NA	NA	NA	NA	NA	-187387	+	ENSG00000286295.1	ENSG00000286295
chr11	1055001	1056000	1000	*	4.73651e-11	1.47355e-09	-50.8095	exon	NA	NA	ENSG00000254872.3	LINC02688	NA	NA	5122	+	ENSG00000254872.3	LINC02688
chr11	1827001	1828000	1000	*	2.88737e-14	1.38736e-12	-58.0087	promoter	ENSG00000149043.17	SYT8	NA	NA	NA	NA	-308	+	ENSG00000149043.17	SYT8
chr11	2903001	2904000	1000	*	2.1336e-16	1.32754e-14	-60.2105	promoter exon intron	ENSG00000254827.7	SLC22A18AS	ENSG00000110628.16; ENSG00000254827.7	SLC22A18; SLC22A18AS	ENSG00000110628.16; ENSG00000110628.16; ENSG00000254827.7	SLC22A18; SLC22A18; SLC22A18AS	0	-	ENSG00000254827.7	SLC22A18AS
chr11	8601001	8602000	1000	*	1.63762e-17	1.144e-15	-58.6193	intergenic	NA	NA	NA	NA	NA	NA	-6713	-	ENSG00000130413.16	STK33
chr11	12845001	12846000	1000	*	1.75181e-18	1.34085e-16	-50.7976	intron	NA	NA	NA	NA	ENSG00000187079.20	TEAD1	-2796	+	ENSG00000255067.1	ENSG00000255067
chr11	19225001	19226000	1000	*	2.4773e-22	2.81625e-20	-55.2455	exon intron	NA	NA	ENSG00000129173.13; ENSG00000129173.13	E2F8; E2F8	ENSG00000255308.1; ENSG00000129173.13; ENSG00000129173.13	CSRP3-AS1; E2F8; E2F8	-14431	-	ENSG00000129170.10	CSRP3
chr11	64330001	64331000	1000	*	4.13579e-25	6.15341e-23	-53.7143	intron	NA	NA	NA	NA	ENSG00000236935.3	ENSG00000236935	9155	-	ENSG00000236935.3	ENSG00000236935
chr11	115646001	115647000	1000	*	2.35132e-18	1.78362e-16	54.7023	exon	NA	NA	ENSG00000260254.1	ENSG00000260254	NA	NA	7439	+	ENSG00000260254.1	ENSG00000260254
chr12	8681001	8682000	1000	*	2.62154e-13	1.11274e-11	-55.9721	promoter exon intron	ENSG00000166532.16	RIMKLB	ENSG00000166532.16	RIMKLB	ENSG00000166532.16	RIMKLB	0	+	ENSG00000166532.16	RIMKLB
chr12	26815001	26816000	1000	*	1.92645e-18	1.47054e-16	-51.4757	intron	NA	NA	NA	NA	ENSG00000123104.12	ITPR2	14159	+	ENSG00000256640.1	ENSG00000256640
chr12	51028001	51029000	1000	*	2.34579e-12	8.80652e-11	-57.4194	promoter exon intron	ENSG00000110911.17	SLC11A2	ENSG00000110911.17; ENSG00000110911.17	SLC11A2; SLC11A2	ENSG00000110911.17; ENSG00000110911.17	SLC11A2; SLC11A2	0	-	ENSG00000110911.17	SLC11A2
chr12	69649001	69650000	1000	*	1.03269e-10	3.04624e-09	-51.1569	intron	NA	NA	NA	NA	ENSG00000127325.19	BEST3	11430	-	ENSG00000279551.1	ENSG00000279551
chr12	115624001	115625000	1000	*	3.62504e-43	1.77704e-40	52.8108	intron	NA	NA	NA	NA	ENSG00000257407.1	ENSG00000257407	14735	-	ENSG00000257407.1	ENSG00000257407
chr13	23392001	23393000	1000	*	5.7632e-26	9.34532e-24	-53.5462	intron	NA	NA	NA	NA	ENSG00000151835.17	SACS	18579	+	ENSG00000232163.2	RPLP1P13
chr13	98776001	98777000	1000	*	2.11956e-16	1.32153e-14	-51.5779	intergenic	NA	NA	NA	NA	NA	NA	-23330	-	ENSG00000088386.17	SLC15A1
chr13	99079001	99080000	1000	*	7.74169e-13	3.0795e-11	-53.5944	intron	NA	NA	NA	NA	ENSG00000088387.22	DOCK9	6626	-	ENSG00000088387.22	DOCK9
chr13	111056001	111057000	1000	*	5.41607e-22	5.96521e-20	-70.7374	intergenic	NA	NA	NA	NA	NA	NA	-38839	+	ENSG00000225870.1	LINC00368
chr13	111409001	111410000	1000	*	1.24204e-12	4.83181e-11	-52.549	intergenic	NA	NA	NA	NA	NA	NA	92818	+	ENSG00000153495.11	TEX29
chr13	113664001	113665000	1000	*	1.04627e-22	1.23238e-20	-52.4518	intergenic	NA	NA	NA	NA	NA	NA	-2220	+	ENSG00000185974.7	GRK1
chr14	64938001	64939000	1000	*	1.98746e-23	2.48967e-21	-70.3003	intron	NA	NA	NA	NA	ENSG00000125954.13; ENSG00000258289.10	CHURC1-FNTB; CHURC1	3747	-	ENSG00000176153.13	GPX2
chr14	77502001	77503000	1000	*	2.54262e-18	1.92357e-16	-74.5935	intergenic	NA	NA	NA	NA	NA	NA	-3186	-	ENSG00000100593.18	ISM2
chr14	99745001	99746000	1000	*	6.37174e-15	3.3605e-13	-61.4316	intron	NA	NA	NA	NA	ENSG00000066629.19	EML1	7309	+	ENSG00000066629.19	EML1
chr15	44264001	44265000	1000	*	1.89748e-10	5.36398e-09	-50.7692	intergenic	NA	NA	NA	NA	NA	NA	23409	-	ENSG00000289277.1	ENSG00000289277
chr15	52974001	52975000	1000	*	2.04664e-09	4.88515e-08	-52.2527	intergenic	NA	NA	NA	NA	NA	NA	-35484	-	ENSG00000259612.1	EEF1A1P22
chr16	533001	534000	1000	*	4.05425e-17	2.72232e-15	-50.1147	exon intron	NA	NA	ENSG00000103326.12	CAPN15	ENSG00000103326.12; ENSG00000103326.12	CAPN15; CAPN15	-1317	+	ENSG00000266124.1	MIR5587
chr16	50719001	50720000	1000	*	2.12335e-12	8.01045e-11	-54.1483	exon intron	NA	NA	ENSG00000167207.15	NOD2	ENSG00000167207.15	NOD2	6158	+	ENSG00000270120.1	ENSG00000270120
chr16	64997001	64998000	1000	*	1.00518e-13	4.51039e-12	-57.9675	intron	NA	NA	NA	NA	ENSG00000140937.14	CDH11	-13775	-	ENSG00000278893.1	ENSG00000278893
chr16	85538001	85539000	1000	*	3.49832e-15	1.90181e-13	67.8274	intron	NA	NA	NA	NA	ENSG00000131149.19	GSE1	44572	-	ENSG00000270124.1	ENSG00000270124
chr17	27753001	27754000	1000	*	1.36264e-11	4.59672e-10	-56.0393	exon intron	NA	NA	ENSG00000266786.1	LGALS9DP	ENSG00000266786.1; ENSG00000266786.1	LGALS9DP; LGALS9DP	6870	+	ENSG00000266786.1	LGALS9DP
chr17	55434001	55435000	1000	*	2.49168e-13	1.05974e-11	-53.7143	intergenic	NA	NA	NA	NA	NA	NA	-12078	-	ENSG00000108960.9	MMD
chr17	64144001	64145000	1000	*	1.71816e-51	1.42855e-48	-53.7023	promoter	ENSG00000266402.5	SNHG25	NA	NA	NA	NA	-938	+	ENSG00000266402.5	SNHG25
chr17	77147001	77148000	1000	*	1.06648e-22	1.2527e-20	-50.5123	intron	NA	NA	NA	NA	ENSG00000129657.16	SEC14L1	4675	-	ENSG00000222808.1	RNU4-47P
chr17	77560001	77561000	1000	*	3.9274e-27	6.96802e-25	-50.5079	exon intron	NA	NA	ENSG00000267506.7; ENSG00000267506.7; ENSG00000267506.7	ENSG00000267506; ENSG00000267506; ENSG00000267506	ENSG00000267506.7; ENSG00000267506.7	ENSG00000267506; ENSG00000267506	7696	-	ENSG00000267466.1	ENSG00000267466
chr17	79225001	79226000	1000	*	3.1019e-14	1.48288e-12	-55.1064	intron	NA	NA	NA	NA	ENSG00000167281.20	RBFOX3	92280	+	ENSG00000266711.1	ENSG00000266711
chr17	81362001	81363000	1000	*	2.79663e-11	9.0585e-10	-50.8408	promoter exon intron	ENSG00000263154.1	ENSG00000263154	ENSG00000263154.1	ENSG00000263154	ENSG00000263154.1	ENSG00000263154	0	+	ENSG00000263154.1	ENSG00000263154
chr17	82577001	82578000	1000	*	2.12183e-52	1.83619e-49	-57.6564	promoter exon intron	ENSG00000265136.1; ENSG00000262652.1	ENSG00000265136; ENSG00000262652	ENSG00000265136.1	ENSG00000265136	ENSG00000141568.21; ENSG00000265136.1	FOXK2; ENSG00000265136	0	-	ENSG00000265136.1	ENSG00000265136
chr18	74450001	74451000	1000	*	3.98887e-10	1.07154e-08	-55	intron	NA	NA	NA	NA	ENSG00000187773.9	DIPK1C	6945	-	ENSG00000187773.9	DIPK1C
chr19	6398001	6399000	1000	*	8.12983e-19	6.54765e-17	-55.2632	intron	NA	NA	NA	NA	ENSG00000214347.8	ENSG00000214347	-4021	-	ENSG00000125651.14	GTF2F1
chr19	18155001	18156000	1000	*	4.1301e-10	1.10423e-08	-51.2262	exon intron	NA	NA	ENSG00000105647.19; ENSG00000268173.3	PIK3R2; ENSG00000268173	ENSG00000105647.19; ENSG00000268173.3	PIK3R2; ENSG00000268173	1839	+	ENSG00000105647.19	PIK3R2
chr19	34427001	34428000	1000	*	7.82567e-39	2.98951e-36	-51.7652	promoter intron	ENSG00000267024.1; ENSG00000126261.13	ENSG00000267024; UBA2	NA	NA	ENSG00000267024.1	ENSG00000267024	274	-	ENSG00000267024.1	ENSG00000267024
chr19	41713001	41714000	1000	*	1.22867e-16	7.87009e-15	-53.7481	intron	NA	NA	NA	NA	ENSG00000267881.2; ENSG00000105388.17	ENSG00000267881; CEACAM5	4345	+	ENSG00000267881.2	ENSG00000267881
chr19	45880001	45881000	1000	*	4.82543e-24	6.45474e-22	-60.9756	intergenic	NA	NA	NA	NA	NA	NA	5142	-	ENSG00000170604.5	IRF2BP1
chr19	46494001	46495000	1000	*	5.14201e-24	6.85659e-22	53.5714	promoter exon intron	ENSG00000204851.7; ENSG00000204850.4	PNMA8B; ENSG00000204850	ENSG00000204850.4; ENSG00000204851.7	ENSG00000204850; PNMA8B	ENSG00000230510.9	PPP5D1P	0	+	ENSG00000204850.4	ENSG00000204850
chr19	48859001	48860000	1000	*	3.12261e-20	2.91331e-18	57.2561	exon intron	NA	NA	ENSG00000105559.12; ENSG00000105559.12; ENSG00000105559.12	PLEKHA4; PLEKHA4; PLEKHA4	ENSG00000105559.12; ENSG00000105559.12; ENSG00000105559.12	PLEKHA4; PLEKHA4; PLEKHA4	8618	-	ENSG00000105559.12	PLEKHA4
chr19	50791001	50792000	1000	*	8.88813e-31	2.06514e-28	-57.4981	promoter exon intron	ENSG00000142513.6	ACP4	ENSG00000142513.6	ACP4	ENSG00000142513.6; ENSG00000142513.6; ENSG00000261341.7	ACP4; ACP4; ENSG00000261341	587	+	ENSG00000142513.6	ACP4
chr19	55333001	55334000	1000	*	4.04453e-25	6.0282e-23	-55.1892	promoter exon intron	ENSG00000180061.10	TMEM150B	ENSG00000180061.10	TMEM150B	ENSG00000180061.10	TMEM150B	49	-	ENSG00000180061.10	TMEM150B
chr21	14684001	14685000	1000	*	1.35447e-12	5.24995e-11	52.7778	intron	NA	NA	NA	NA	ENSG00000232884.11	ENSG00000232884	-25181	-	ENSG00000155307.19	SAMSN1
chr21	33290001	33291000	1000	*	1.38633e-22	1.6172e-20	-52.5686	intron	NA	NA	NA	NA	ENSG00000249624.10; ENSG00000243646.11	ENSG00000249624; IL10RB	23635	+	ENSG00000243646.11	IL10RB
chr21	34864001	34865000	1000	*	6.2438e-16	3.70034e-14	-53.0327	intron	NA	NA	NA	NA	ENSG00000286153.2; ENSG00000159216.19	ENSG00000286153; RUNX1	27716	+	ENSG00000286153.2	ENSG00000286153
chr21	36461001	36462000	1000	*	7.05155e-09	1.51168e-07	-50.2101	exon intron	NA	NA	ENSG00000159261.12	CLDN14	ENSG00000230479.1; ENSG00000233818.1; ENSG00000159261.12	ENSG00000230479; CLDN14-AS1; CLDN14	15271	+	ENSG00000233818.1	CLDN14-AS1
chr21	44835001	44836000	1000	*	5.49618e-19	4.51224e-17	-51.6886	intergenic	NA	NA	NA	NA	NA	NA	-16223	-	ENSG00000184900.16	SUMO3
chr22	38030001	38031000	1000	*	3.00842e-19	2.53614e-17	-50.6452	intron	NA	NA	NA	NA	ENSG00000100142.16	POLR2F	3229	-	ENSG00000222044.1	ENSG00000222044
chr22	50075001	50076000	1000	*	1.34013e-13	5.90404e-12	-56.1208	intron	NA	NA	NA	NA	ENSG00000100427.16	MLC1	9427	-	ENSG00000100427.16	MLC1

## Sheet: Table S6
The summary table of established-linkage between Crohn’s disease genes.
Gene Symbol	Gene Name	Function	Associated Diseases	Association with CD	Associated pathways
NOD2	nucleotide-binding oligomerization domain containing 2	Pattern recognition receptor (PRR) detects bacterial peptidoglycan fragments and other danger signals and plays an important role in gastrointestinal immunity	Blau Syndrome, Inflammatory Bowel Disease 1, Ulcerative Colitis, Crohn's Disease	NOD2 is a general sensor for bacterial peptidoglycan. NOD2-associated dysregulated microbiota leads to the susceptibility of CD.	Leads to the activation of NF-κB, MAPK and caspase-1 signaling pathway, resulting in increased expressions of proinflammatory factors. Also trigger Notch1 and IFN pathway. Associated with immune pathways such as autophagy and endoplasmic reticulum stress
IRGM	immunity related GTPase M	Putative GTPase required for clearance of acute protozoan and bacterial infections, Aids innate immune response through regulation of autophagy, Regulates proinflammatory cytokine production and prevents endotoxemia upon infection	Inflammatory Bowel Disease 19, Crohn's Disease, Colitis, Ulcerative Colitis	IRGM has a protective function in Crohn's disease by suppressing proinflammatory responses.	IRGM is a negative regulator of the NLRP3 inflammasome activation, it also inhibit both NF-kB and p38 MAPK proinflammatory signaling pathways to control proinflammatory cytokine response. Together with NOD2 and ATG16L1, they form a molecular complex to modulate autophagic responses to microbial products.
CARD9	caspase recruitment domain family member 9	Plays a key role in innate immune response against fungi by forming signaling complexes downstream of C-type lectin receptors	Immunodeficiency 103 Fungal Infections, Candidiasis, Phaeohyphomycosis, Endophthalmitis, Sporotrichosis	CARD9 plays a major role in the sensing of pathogenic microorganisms. Some alleles involved in proinflammatory signals, while others serve a anti-inflammatory protective role.	Inhibiting apoptosis by inhibiting apoptosome complex. CARD9 is required for TLR receptors to activate MAPK, CLR receptors to activate NF‐κB inflammatory pathways.
MUC2	mucin 2, oligomeric mucus/gel-forming	Coats the epithelia of the intestines, airways, and other mucus membrane-containing organs; Thought to provide a protective, lubricating barrier against particles and infectious agents	Gastric Cancer, Pseudomyxoma Peritonei, Pancreatic Ductal Carcinoma, Cystadenocarcinoma, Barrett Esophagus	Downregulation of this gene has been observed in CD patients. MUC2 is a secreted protein produced by epithelial goblet cells as the main component of mucus. Damage to the mucin layer is caused by inflammation.	Contributes to intestinal barrier integrity and regulates gut microbiota homeostasis.
TYK2	tyrosine kinase 2	Tyrosine kinase of the non-receptor type involved in numerous cytokines and interferons signaling, which regulates cell growth, development, cell migration, innate and adaptive immunity	Immunodeficiency 35, Primary Cutaneous Anaplastic Large Cell Lymphoma, X-Linked Lymphoproliferative Syndrome, Polycythemia Vera, Hyper Ige Syndrome	Part of the activator in the JAK/STAT system associates with IL-23 and activates proinflammatory TH17 cells. TH17 cells are essential mediators of inflammation in CD.	As part of the JAK family, it mediates immune signaling and inflammatory signaling pathways.
